# Supplementary material for: Two series of Ln-MOFs by solvent induced self-assembly demonstrating the rapid selective sensing of Mg2+ and Fe3+ cations
Source: Royal Society of Chemistry journal article supplement (doi:10.1039/d0dt03264f), 2020-01-01
Supplement: d0dt03264f1.pdf [file d0dt03264f1.pdf]

## Supporting Information

*for*

### **Two series of Ln-MOFs by solvent induced self-assembly demonstrating the rapid selectively sensing of Mg<sup>2+</sup> and Fe<sup>3+</sup> cations**

Xiaokang Wang,<sup>a</sup> Yutong Wang,<sup>a</sup> Xia Wang,<sup>a</sup> Kebin Lu,<sup>a</sup> Weifeng Jiang,<sup>a</sup> Pei-Pei Cui,<sup>c</sup> Hongguo Hao<sup>\*,b</sup> and Fangna Dai<sup>\*,a</sup>

<sup>a</sup>*College of Science, School of Materials Science and Engineering, China University of Petroleum (East China), Qingdao, Shandong 266580, China.*

<sup>b</sup>*Shandong Provincial Key Laboratory of Chemical Energy Storage and Novel Cell Technology, School of Chemistry and Chemical Engineering, College of Materials Science and Engineering, Liaocheng University, Liaocheng 252059, China*

<sup>c</sup>*Dezhou University, Dezhou, Shandong 253023, China*

*\*E-mail: hhg207@126.com, fndai@upc.edu.cn*

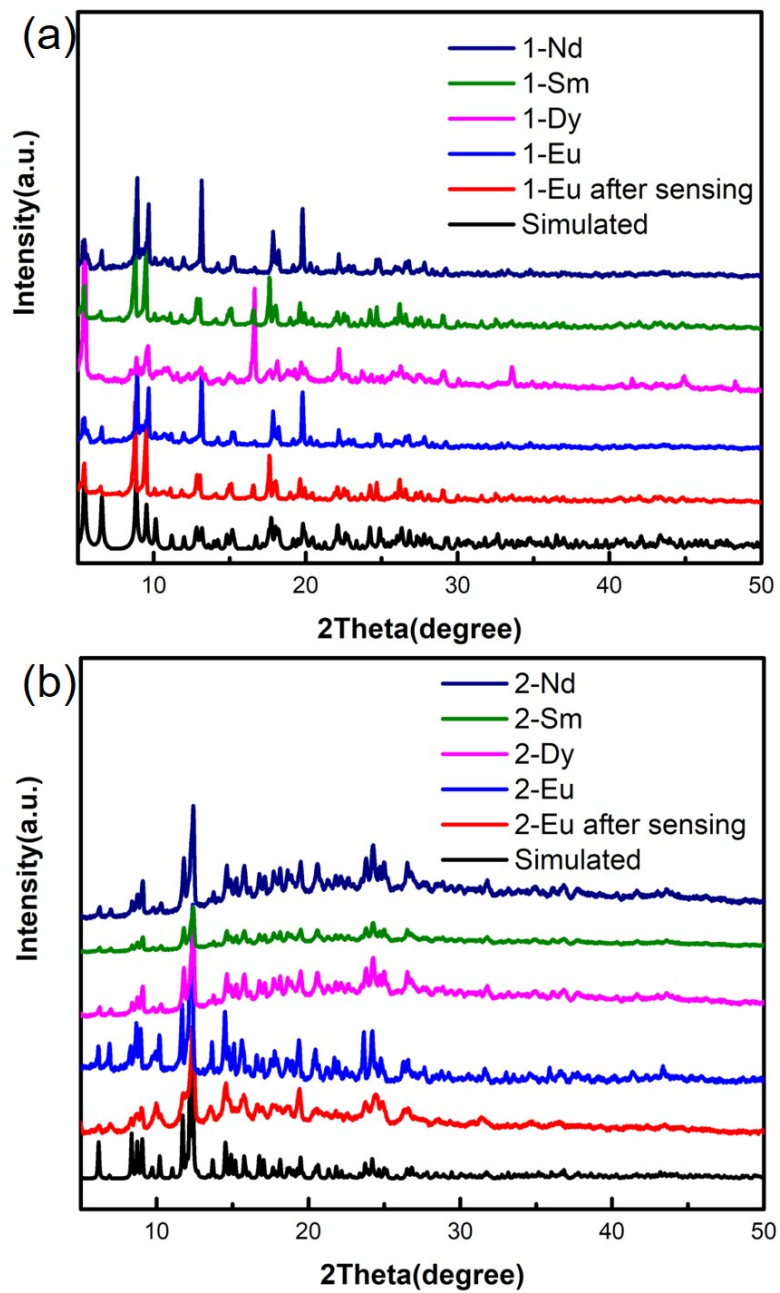

Figure S1 PXR D patterns of the simulated (black), **1-Ln** (a) and **2-Ln** (b).

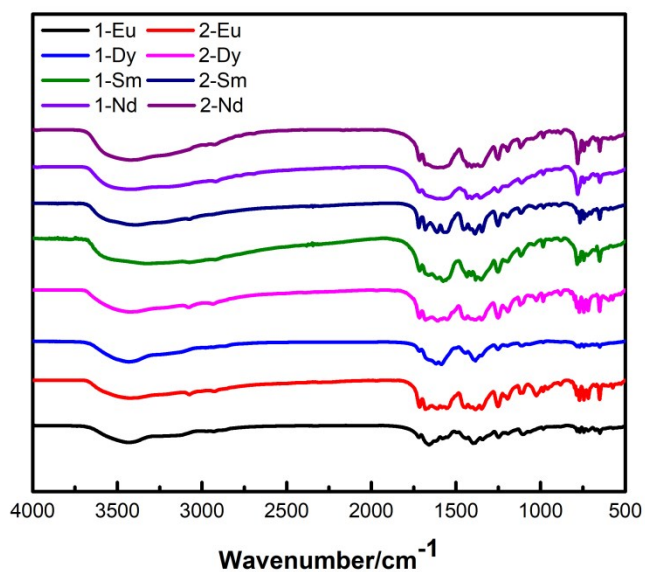

Figure S2 IR spectra of 1-Ln and 2-Ln.

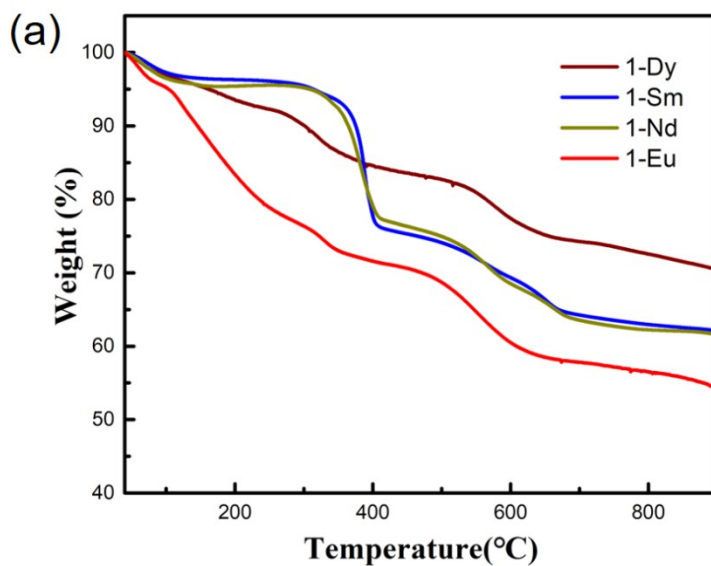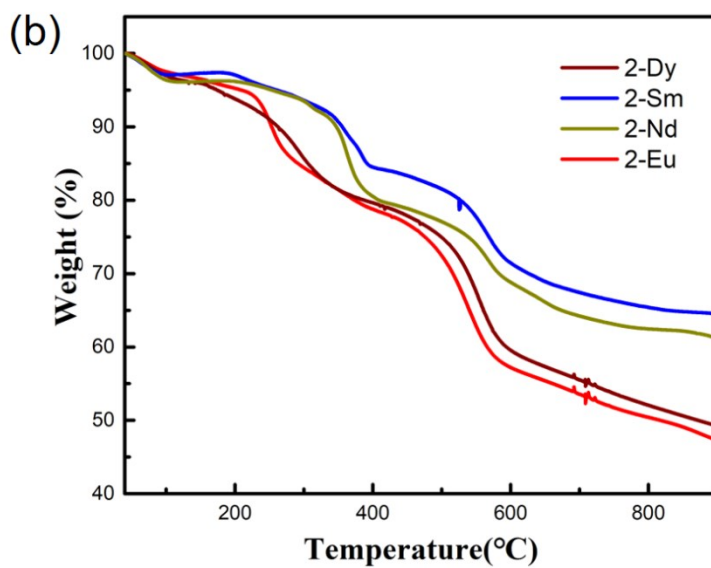

Figure S3 TGA curves of 1-Ln (a) and 2-Ln (b).

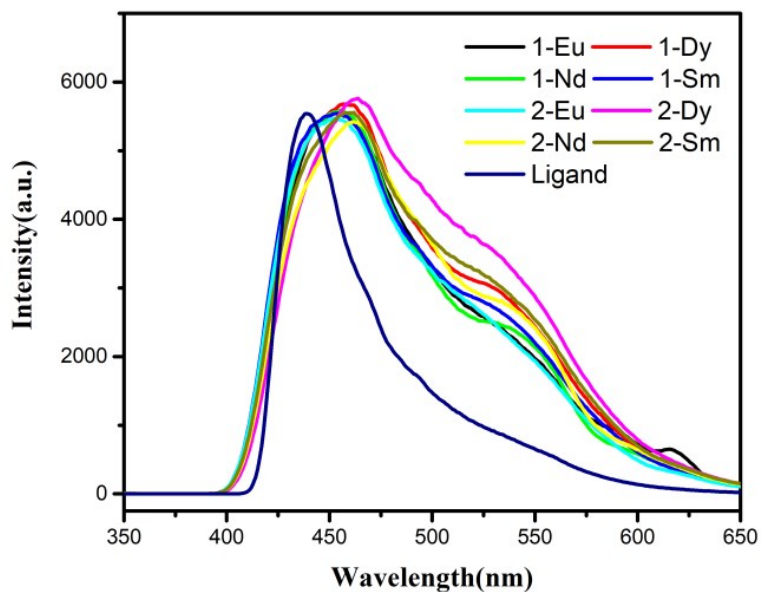

**Figure S4** The solid-state fluorescence spectra of ligand, **1-Ln** and **2-Ln**.

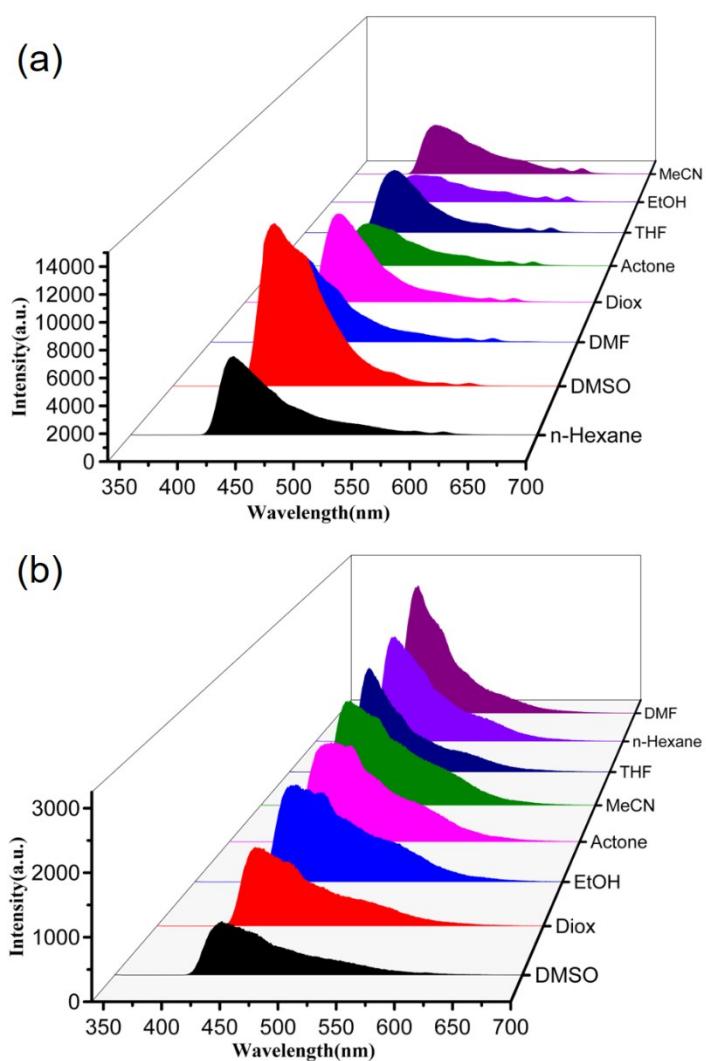

**Figure S5** The fluorescence spectra of **1-Eu** (a) and **2-Eu** (b) dispersed in different solvents.

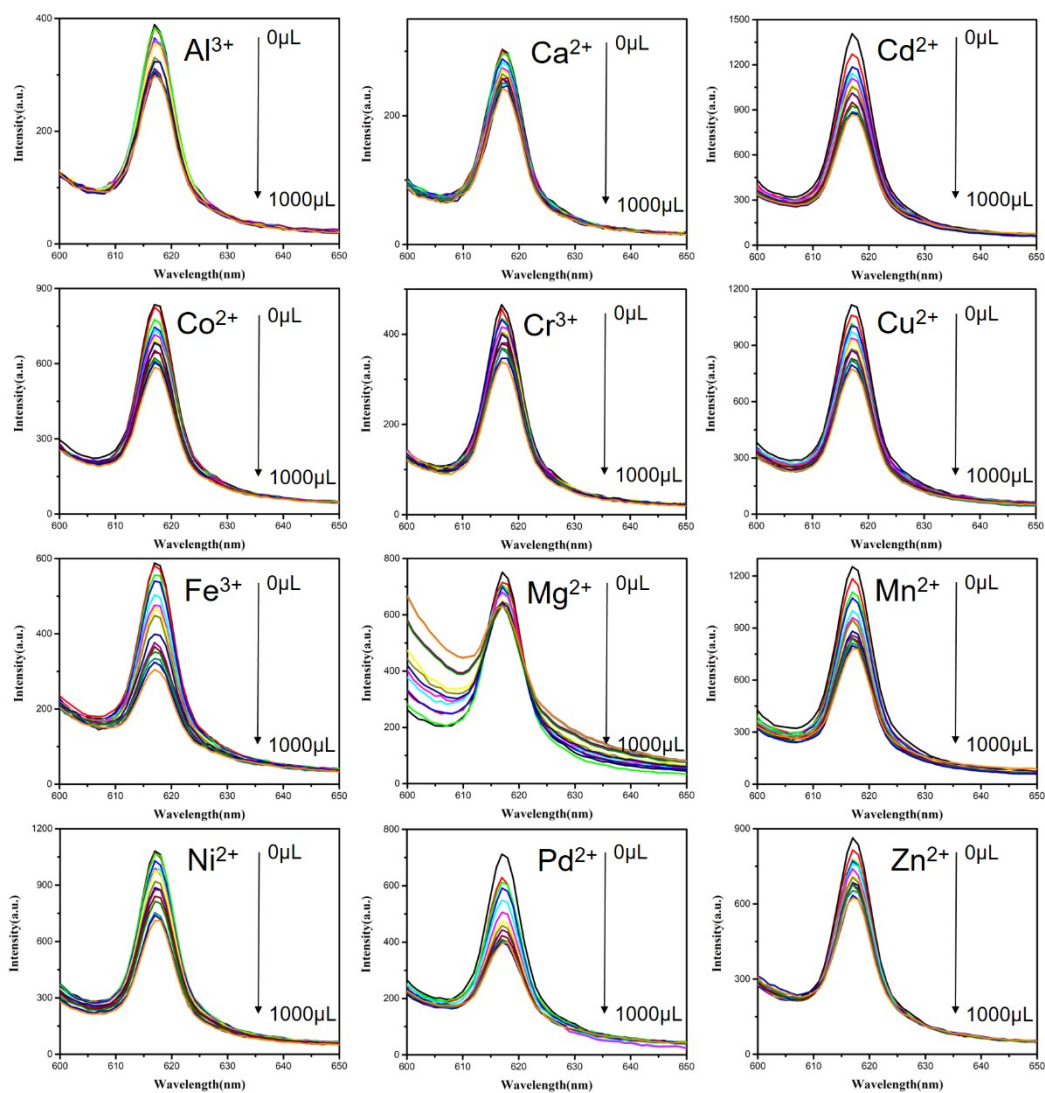

**Figure S6** Effect on the emission spectra of **1-Eu** dispersed in EtOH upon incremental addition of a metal ion ( $\text{Mg}^{2+}$ ,  $\text{Ca}^{2+}$ ,  $\text{Mn}^{2+}$ ,  $\text{Co}^{2+}$ ,  $\text{Ni}^{2+}$ ,  $\text{Cu}^{2+}$ ,  $\text{Zn}^{2+}$ ,  $\text{Cd}^{2+}$ ,  $\text{Pd}^{2+}$ ,  $\text{Al}^{3+}$ ,  $\text{Cr}^{3+}$  or  $\text{Fe}^{3+}$ ) solution (1 mM) in EtOH.

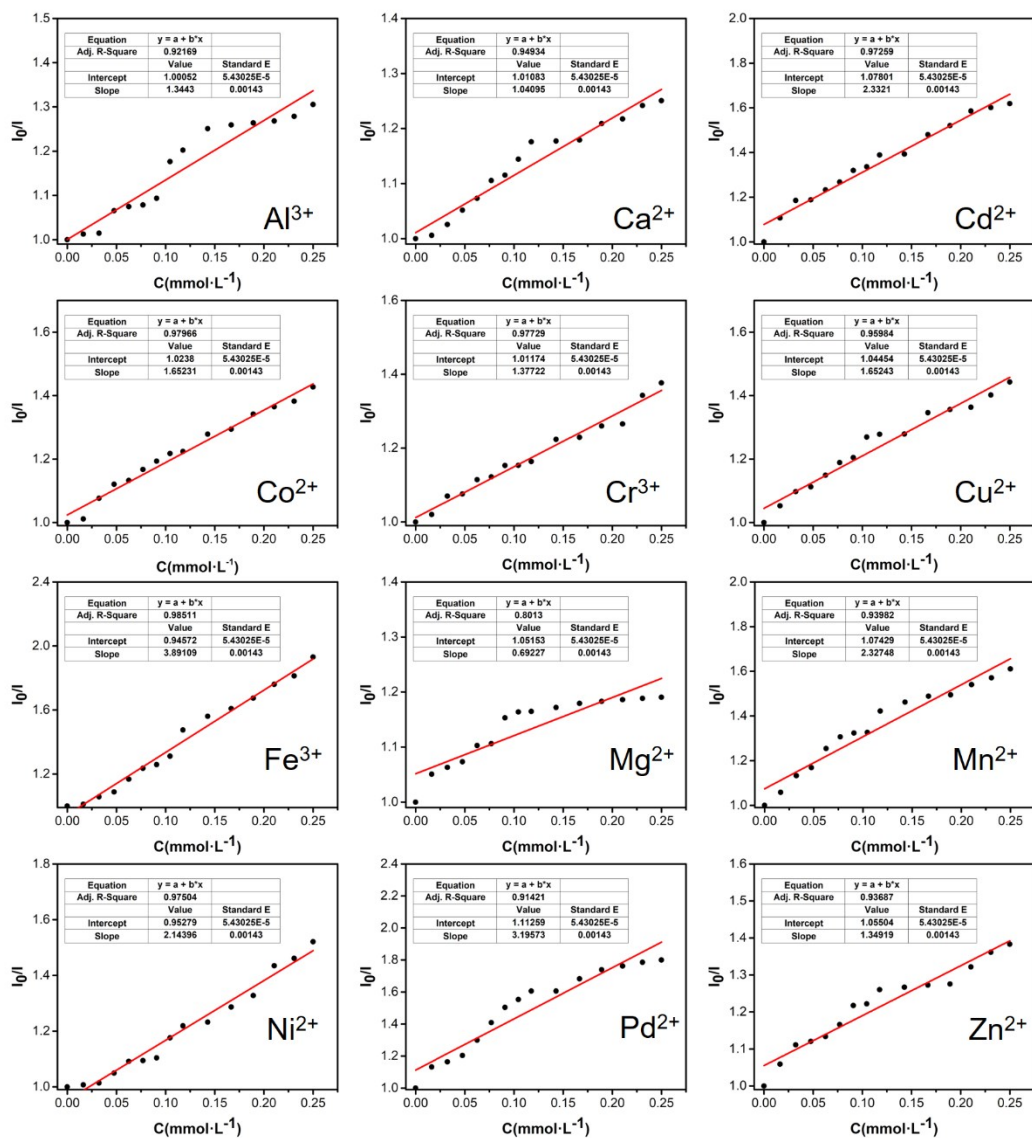

Figure S7 The Stern-Volmer plots of  $I_0/I$  versus the ion concentration of 1-Eu.

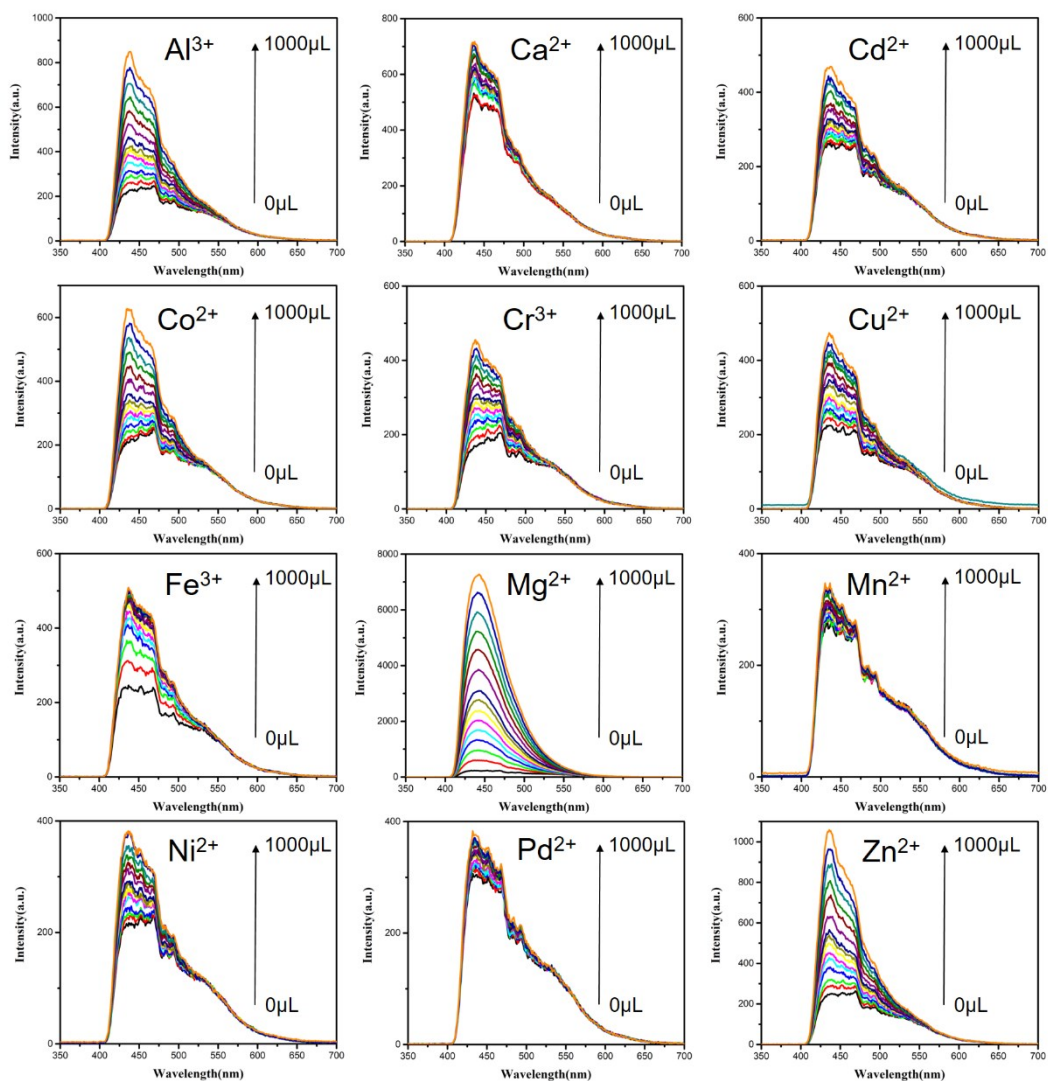

**Figure S8** Effect on the emission spectra of **2-Eu** dispersed in EtOH upon incremental addition of a metal ion (Mg<sup>2+</sup>, Ca<sup>2+</sup>, Mn<sup>2+</sup>, Co<sup>2+</sup>, Ni<sup>2+</sup>, Cu<sup>2+</sup>, Zn<sup>2+</sup>, Cd<sup>2+</sup>, Pd<sup>2+</sup>, Al<sup>3+</sup>, Cr<sup>3+</sup> or Fe<sup>3+</sup>) solution (1mM) in EtOH.

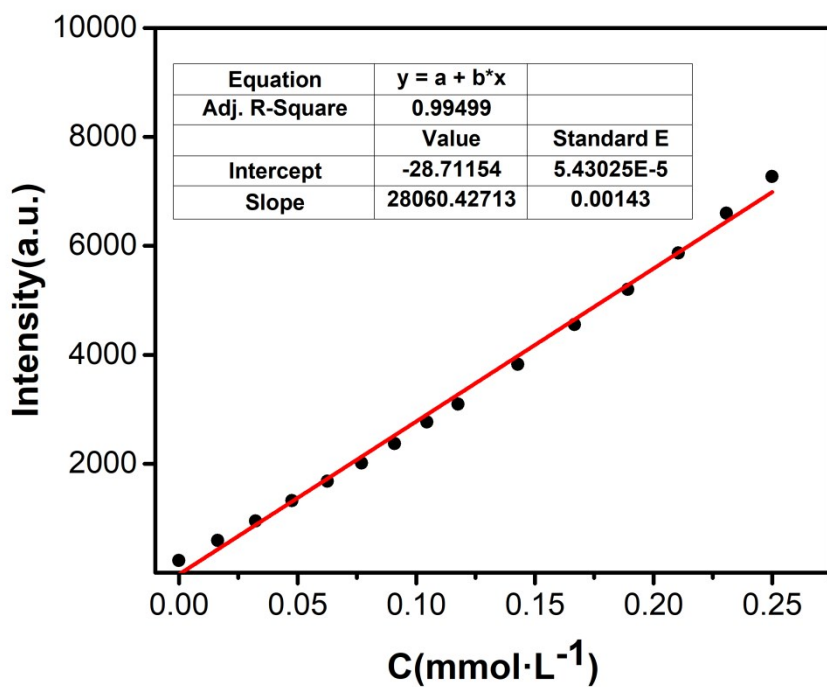

Figure S9 Correlation between the luminescence intensity of 2-Eu and the concentration of  $Mg^{2+}$ .

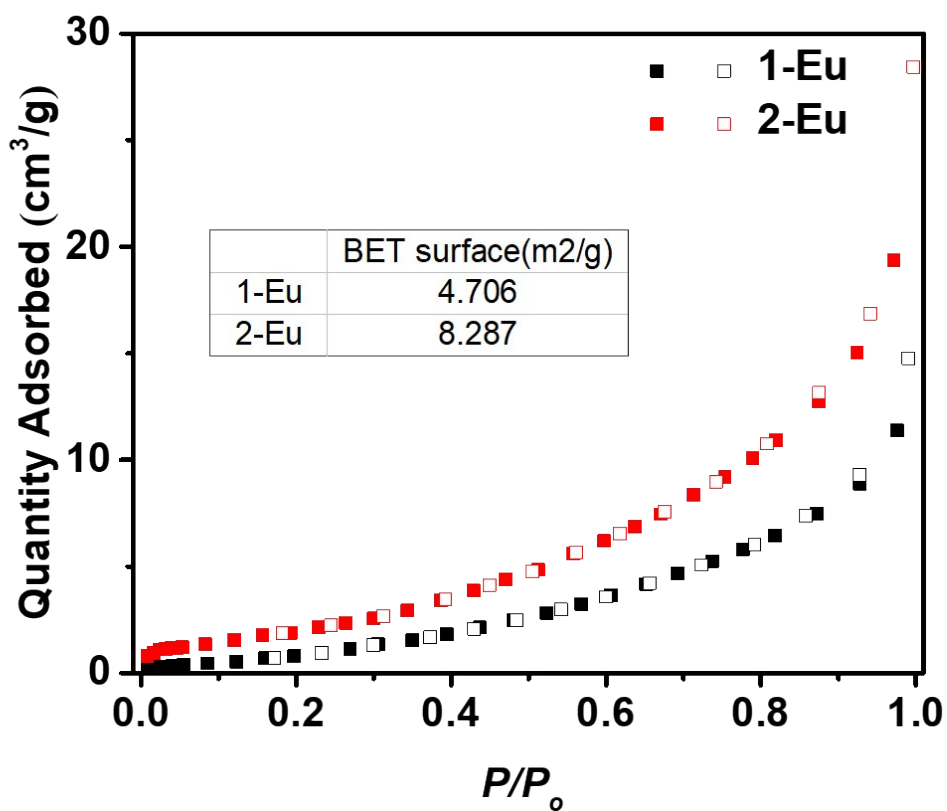

Figure S10  $N_2$  sorption isotherms of 1-Eu and 2-Eu at 77 K (insert, BET surface).



**Table S1.** Selected bond lengths (Å) for **1-Eu**.

| Atom | Atom            | Length/Å | Atom | Atom            | Length/Å |
|------|-----------------|----------|------|-----------------|----------|
| Eu1  | O1              | 2.375(3) | Eu1  | O7              | 2.356(3) |
| Eu1  | O2 <sup>1</sup> | 2.392(3) | Eu1  | O8 <sup>2</sup> | 2.567(3) |
| Eu1  | O3              | 2.536(4) | Eu1  | O8 <sup>3</sup> | 2.464(3) |
| Eu1  | O4              | 2.492(4) | Eu1  | O9 <sup>2</sup> | 2.468(3) |
| Eu1  | O6              | 2.423(4) |      |                 |          |

**Table S2.** Selected bond angles (°) for **1-Eu**.

| Atom            | Atom | Atom            | Angle/°    | Atom            | Atom | Atom            | Angle/°    |
|-----------------|------|-----------------|------------|-----------------|------|-----------------|------------|
| O1              | Eu1  | O2 <sup>1</sup> | 135.32(11) | O6              | Eu1  | O8 <sup>3</sup> | 81.95(13)  |
| O1              | Eu1  | O3              | 73.82(13)  | O6              | Eu1  | O8 <sup>2</sup> | 137.20(12) |
| O1              | Eu1  | O4              | 124.00(14) | O6              | Eu1  | O9 <sup>3</sup> | 71.93(14)  |
| O1              | Eu1  | O6              | 142.65(13) | O7              | Eu1  | O1              | 85.24(13)  |
| O1              | Eu1  | O8 <sup>2</sup> | 70.31(11)  | O7              | Eu1  | O2 <sup>1</sup> | 139.33(14) |
| O1              | Eu1  | O8 <sup>3</sup> | 80.81(10)  | O7              | Eu1  | O3              | 68.56(14)  |
| O1              | Eu1  | O9 <sup>3</sup> | 71.34(12)  | O7              | Eu1  | O4              | 77.73(16)  |
| O2 <sup>1</sup> | Eu1  | O3              | 113.66(13) | O7              | Eu1  | O6              | 77.99(15)  |
| O2 <sup>1</sup> | Eu1  | O4              | 75.60(14)  | O7              | Eu1  | O8 <sup>3</sup> | 124.93(12) |
| O2 <sup>1</sup> | Eu1  | O6              | 69.55(13)  | O7              | Eu1  | O8 <sup>2</sup> | 143.41(13) |
| O2 <sup>1</sup> | Eu1  | O8 <sup>3</sup> | 74.61(11)  | O7              | Eu1  | O9 <sup>3</sup> | 73.15(12)  |
| O2 <sup>1</sup> | Eu1  | O8 <sup>2</sup> | 68.65(11)  | O8 <sup>2</sup> | Eu1  | O3              | 78.48(12)  |
| O2 <sup>1</sup> | Eu1  | O9 <sup>3</sup> | 116.84(11) | O8 <sup>2</sup> | Eu1  | O4              | 93.49(15)  |
| O3              | Eu1  | O8 <sup>3</sup> | 150.31(12) | O8 <sup>2</sup> | Eu1  | O8 <sup>3</sup> | 78.63(10)  |
| O4              | Eu1  | O3              | 50.25(15)  | O8 <sup>2</sup> | Eu1  | O9 <sup>3</sup> | 120.69(11) |
| O4              | Eu1  | O8 <sup>3</sup> | 150.04(13) | O9 <sup>3</sup> | Eu1  | O3              | 129.50(12) |
| O6              | Eu1  | O3              | 127.73(15) | O9 <sup>3</sup> | Eu1  | O4              | 145.75(15) |
| O6              | Eu1  | O4              | 84.81(17)  | O9 <sup>3</sup> | Eu1  | O8 <sup>3</sup> | 51.87(9)   |

**Table S3.** Selected bond lengths (Å) for **1-Nd**.

| Atom | Atom            | Length/Å | Atom | Atom            | Length/Å |
|------|-----------------|----------|------|-----------------|----------|
| Nd1  | O1              | 2.418(5) | Nd1  | O7              | 2.380(5) |
| Nd1  | O2 <sup>1</sup> | 2.442(5) | Nd1  | O8 <sup>2</sup> | 2.619(5) |
| Nd1  | O3              | 2.571(6) | Nd1  | O8 <sup>3</sup> | 2.517(5) |
| Nd1  | O4              | 2.545(7) | Nd1  | O9 <sup>2</sup> | 2.525(5) |
| Nd1  | O6              | 2.448(6) |      |                 |          |

**Table S4.** Selected bond angles (°) for **1-Nd**.

| Atom            | Atom | Atom            | Angle/°    | Atom            | Atom | Atom            | Angle/°    |
|-----------------|------|-----------------|------------|-----------------|------|-----------------|------------|
| O1              | Nd1  | O2 <sup>1</sup> | 134.44(17) | O6              | Nd1  | O8 <sup>2</sup> | 81.7(2)    |
| O1              | Nd1  | O3              | 74.5(2)    | O6              | Nd1  | O8 <sup>3</sup> | 135.99(19) |
| O1              | Nd1  | O4              | 123.7(2)   | O6              | Nd1  | O9 <sup>2</sup> | 72.2(2)    |
| O1              | Nd1  | O6              | 142.8(2)   | O7              | Nd1  | O1              | 86.7(2)    |
| O1              | Nd1  | O8 <sup>2</sup> | 78.89(16)  | O7              | Nd1  | O2 <sup>1</sup> | 138.8(2)   |
| O1              | Nd1  | O8 <sup>3</sup> | 70.24(18)  | O7              | Nd1  | O3              | 68.9(2)    |
| O1              | Nd1  | O9 <sup>2</sup> | 70.90(19)  | O7              | Nd1  | O4              | 76.5(3)    |
| O2 <sup>1</sup> | Nd1  | O3              | 113.4(2)   | O7              | Nd1  | O6              | 78.3(2)    |
| O2 <sup>1</sup> | Nd1  | O4              | 76.6(2)    | O7              | Nd1  | O8 <sup>3</sup> | 144.1(2)   |
| O2 <sup>1</sup> | Nd1  | O6              | 69.1(2)    | O7              | Nd1  | O8 <sup>2</sup> | 123.88(19) |
| O2 <sup>1</sup> | Nd1  | O8 <sup>2</sup> | 76.22(18)  | O7              | Nd1  | O9 <sup>2</sup> | 73.57(19)  |
| O2 <sup>1</sup> | Nd1  | O8 <sup>3</sup> | 68.03(18)  | O8 <sup>3</sup> | Nd1  | O3              | 78.47(18)  |
| O2 <sup>1</sup> | Nd1  | O9 <sup>2</sup> | 117.05(18) | O8 <sup>3</sup> | Nd1  | O4              | 93.5(2)    |
| O3              | Nd1  | O8 <sup>2</sup> | 149.76(18) | O8 <sup>3</sup> | Nd1  | O8 <sup>2</sup> | 79.26(17)  |
| O4              | Nd1  | O3              | 49.2(2)    | O8 <sup>3</sup> | Nd1  | O9 <sup>2</sup> | 120.61(18) |
| O4              | Nd1  | O8 <sup>2</sup> | 152.7(2)   | O9 <sup>2</sup> | Nd1  | O3              | 129.59(18) |
| O6              | Nd1  | O3              | 128.5(2)   | O9 <sup>2</sup> | Nd1  | O4              | 145.7(2)   |
| O6              | Nd1  | O4              | 85.8(3)    | O9 <sup>2</sup> | Nd1  | O8 <sup>2</sup> | 50.40(15)  |

**Table S5.** Selected bond lengths (Å) for **2-Eu**.

| Atom | Atom             | Length/Å  | Atom | Atom             | Length/Å  |
|------|------------------|-----------|------|------------------|-----------|
| Eu1  | O3               | 2.519(9)  | Eu2  | O2               | 2.332(11) |
| Eu1  | O4               | 2.450(10) | Eu2  | O11              | 3.008(14) |
| Eu1  | O12 <sup>1</sup> | 2.338(7)  | Eu2  | O14 <sup>4</sup> | 2.424(7)  |
| Eu1  | O13 <sup>2</sup> | 2.277(7)  | Eu2  | O16 <sup>5</sup> | 2.322(8)  |
| Eu1  | O15 <sup>3</sup> | 2.414(7)  | Eu2  | O18 <sup>4</sup> | 2.449(9)  |
| Eu1  | O17 <sup>3</sup> | 2.455(7)  | Eu2  | O19              | 2.538(12) |
| Eu1  | O22              | 2.327(13) | Eu2  | O20              | 2.446(13) |
| Eu1  | O23              | 2.413(8)  | Eu2  | O21              | 2.256(14) |
| Eu2  | O1               | 2.35(3)   | Eu2  | O1A              | 2.28(2)   |

**Table S6.** Selected bond angles (°) for **2-Eu**.

| Atom             | Atom | Atom             | Angle/°  | Atom             | Atom | Atom             | Angle/°  |
|------------------|------|------------------|----------|------------------|------|------------------|----------|
| O4               | Eu1  | O3               | 51.9(3)  | O2               | Eu2  | O11              | 43.6(4)  |
| O4               | Eu1  | O17 <sup>1</sup> | 85.2(4)  | O2               | Eu2  | O14 <sup>4</sup> | 75.2(3)  |
| O12 <sup>2</sup> | Eu1  | O3               | 76.0(3)  | O2               | Eu2  | O18 <sup>4</sup> | 126.3(3) |
| O12 <sup>2</sup> | Eu1  | O4               | 123.2(3) | O2               | Eu2  | O19              | 73.5(4)  |
| O12 <sup>2</sup> | Eu1  | O15 <sup>1</sup> | 77.0(3)  | O2               | Eu2  | O20              | 84.3(4)  |
| O12 <sup>2</sup> | Eu1  | O17 <sup>1</sup> | 118.5(3) | O14 <sup>4</sup> | Eu2  | O11              | 65.9(3)  |
| O12 <sup>2</sup> | Eu1  | O23              | 155.1(3) | O14 <sup>4</sup> | Eu2  | O18 <sup>4</sup> | 52.7(3)  |
| O13 <sup>3</sup> | Eu1  | O3               | 76.1(3)  | O14 <sup>4</sup> | Eu2  | O19              | 128.3(4) |
| O13 <sup>3</sup> | Eu1  | O4               | 99.3(4)  | O14 <sup>4</sup> | Eu2  | O20              | 71.8(4)  |
| O13 <sup>3</sup> | Eu1  | O12 <sup>2</sup> | 86.7(3)  | O16 <sup>5</sup> | Eu2  | O1               | 84.4(7)  |
| O13 <sup>3</sup> | Eu1  | O15 <sup>1</sup> | 160.4(3) | O16 <sup>5</sup> | Eu2  | O2               | 87.6(4)  |
| O13 <sup>3</sup> | Eu1  | O17 <sup>1</sup> | 146.5(3) | O16 <sup>5</sup> | Eu2  | O11              | 82.6(4)  |
| O13 <sup>3</sup> | Eu1  | O22              | 85.1(5)  | O16 <sup>5</sup> | Eu2  | O14 <sup>4</sup> | 147.5(4) |
| O13 <sup>3</sup> | Eu1  | O23              | 77.0(3)  | O16 <sup>5</sup> | Eu2  | O18 <sup>4</sup> | 143.6(4) |
| O15 <sup>1</sup> | Eu1  | O3               | 89.3(3)  | O16 <sup>5</sup> | Eu2  | O19              | 69.6(4)  |
| O15 <sup>1</sup> | Eu1  | O4               | 81.1(4)  | O16 <sup>5</sup> | Eu2  | O20              | 134.5(5) |
| O15 <sup>1</sup> | Eu1  | O17 <sup>1</sup> | 53.0(2)  | O18 <sup>4</sup> | Eu2  | O11              | 111.7(4) |
| O17 <sup>1</sup> | Eu1  | O3               | 128.5(3) | O18 <sup>4</sup> | Eu2  | O19              | 127.6(4) |
| O22              | Eu1  | O3               | 148.6(4) | O19              | Eu2  | O11              | 112.0(4) |
| O22              | Eu1  | O4               | 158.3(4) | O20              | Eu2  | O11              | 118.5(4) |
| O22              | Eu1  | O12 <sup>2</sup> | 78.0(4)  | O20              | Eu2  | O18 <sup>4</sup> | 69.4(5)  |
| O22              | Eu1  | O15 <sup>1</sup> | 101.8(5) | O20              | Eu2  | O19              | 65.1(4)  |
| O22              | Eu1  | O17 <sup>1</sup> | 79.8(4)  | O21              | Eu2  | O1               | 105.2(8) |
| O22              | Eu1  | O23              | 81.8(4)  | O21              | Eu2  | O2               | 107.5(6) |
| O23              | Eu1  | O3               | 117.1(3) | O21              | Eu2  | O11              | 64.2(5)  |
| O23              | Eu1  | O4               | 78.6(4)  | O21              | Eu2  | O14 <sup>4</sup> | 83.1(5)  |
| O23              | Eu1  | O15 <sup>1</sup> | 121.9(3) | O21              | Eu2  | O16 <sup>5</sup> | 76.0(6)  |
| O23              | Eu1  | O17 <sup>1</sup> | 71.4(3)  | O21              | Eu2  | O18 <sup>4</sup> | 80.6(6)  |
| O1               | Eu2  | O11              | 164.9(7) | O21              | Eu2  | O19              | 145.6(6) |
| O1               | Eu2  | O14 <sup>4</sup> | 125.4(7) | O21              | Eu2  | O20              | 148.7(6) |
| O1               | Eu2  | O18 <sup>4</sup> | 75.2(7)  | O1A              | Eu2  | O2               | 158.1(6) |
| O1               | Eu2  | O19              | 70.1(7)  | O1A              | Eu2  | O11              | 148.8(6) |
| O1               | Eu2  | O20              | 76.3(7)  | O1A              | Eu2  | O19              | 85.4(6)  |
| O2               | Eu2  | O1               | 143.3(7) | O1A              | Eu2  | O20              | 92.1(7)  |

**Table S7.** Selected bond lengths (Å) for **2-Dy**.

| Atom | Atom             | Length/Å | Atom | Atom             | Length/Å  |
|------|------------------|----------|------|------------------|-----------|
| Dy1  | O3               | 2.471(6) | Dy2  | O18 <sup>4</sup> | 2.475(7)  |
| Dy1  | O4               | 2.407(7) | Dy2  | O19              | 2.451(8)  |
| Dy1  | O12 <sup>1</sup> | 2.277(5) | Dy2  | O20              | 2.28(3)   |
| Dy1  | O13 <sup>2</sup> | 2.254(6) | Dy2  | O21              | 2.31(2)   |
| Dy1  | O15 <sup>3</sup> | 2.395(6) | Dy2  | O20A             | 2.38(3)   |
| Dy1  | O17 <sup>3</sup> | 2.433(6) | Dy2A | O14 <sup>4</sup> | 2.459(12) |
| Dy1  | O22              | 2.290(9) | Dy2A | O16 <sup>5</sup> | 2.149(11) |
| Dy1  | O23              | 2.411(7) | Dy2A | O18 <sup>4</sup> | 2.444(12) |
| Dy2  | O1               | 2.283(7) | Dy2A | O19              | 2.83(2)   |
| Dy2  | O2               | 2.314(7) | Dy2A | O1A              | 2.21(5)   |
| Dy2  | O14 <sup>4</sup> | 2.436(5) | Dy2A | O11A             | 2.19(5)   |
| Dy2  | O16 <sup>5</sup> | 2.314(6) | Dy2A | O21A             | 1.91(3)   |

**Table S8.** Selected bond angles (°) for **2-Dy**.

| Atom             | Atom | Atom             | Angle/°   | Atom             | Atom | Atom             | Angle/°   |
|------------------|------|------------------|-----------|------------------|------|------------------|-----------|
| O4               | Dy1  | O3               | 52.67(19) | O2               | Dy2  | O19              | 77.8(3)   |
| O4               | Dy1  | O17 <sup>1</sup> | 86.2(3)   | O2               | Dy2  | O21              | 84.7(6)   |
| O4               | Dy1  | O23              | 74.7(3)   | O2               | Dy2  | O20A             | 85.8(6)   |
| O12 <sup>2</sup> | Dy1  | O3               | 76.0(2)   | O14 <sup>4</sup> | Dy2  | O18 <sup>4</sup> | 52.14(19) |
| O12 <sup>2</sup> | Dy1  | O4               | 124.7(2)  | O14 <sup>4</sup> | Dy2  | O19              | 133.6(3)  |
| O12 <sup>2</sup> | Dy1  | O15 <sup>1</sup> | 77.1(2)   | O16 <sup>5</sup> | Dy2  | O14 <sup>4</sup> | 141.5(3)  |
| O12 <sup>2</sup> | Dy1  | O17 <sup>1</sup> | 117.1(2)  | O16 <sup>5</sup> | Dy2  | O18 <sup>4</sup> | 137.6(3)  |
| O12 <sup>2</sup> | Dy1  | O22              | 79.5(3)   | O16 <sup>5</sup> | Dy2  | O19              | 70.1(3)   |
| O12 <sup>2</sup> | Dy1  | O23              | 157.3(2)  | O16 <sup>5</sup> | Dy2  | O21              | 67.0(7)   |
| O13 <sup>3</sup> | Dy1  | O3               | 78.1(2)   | O16 <sup>5</sup> | Dy2  | O20A             | 139.9(7)  |
| O13 <sup>3</sup> | Dy1  | O4               | 99.4(3)   | O19              | Dy2  | O18 <sup>4</sup> | 136.6(3)  |
| O13 <sup>3</sup> | Dy1  | O12 <sup>2</sup> | 87.5(2)   | O20              | Dy2  | O2               | 99.0(5)   |
| O13 <sup>3</sup> | Dy1  | O15 <sup>1</sup> | 160.4(2)  | O20              | Dy2  | O14 <sup>4</sup> | 79.2(6)   |
| O13 <sup>3</sup> | Dy1  | O17 <sup>1</sup> | 145.7(2)  | O20              | Dy2  | O16 <sup>5</sup> | 137.4(7)  |
| O13 <sup>3</sup> | Dy1  | O22              | 83.0(3)   | O20              | Dy2  | O18 <sup>4</sup> | 70.6(7)   |
| O13 <sup>3</sup> | Dy1  | O23              | 76.8(2)   | O20              | Dy2  | O19              | 69.9(7)   |
| O15 <sup>1</sup> | Dy1  | O3               | 86.3(2)   | O20              | Dy2  | O21              | 155.2(9)  |
| O15 <sup>1</sup> | Dy1  | O4               | 80.0(3)   | O20              | Dy2  | O20A             | 13.5(8)   |
| O15 <sup>1</sup> | Dy1  | O17 <sup>1</sup> | 53.87(19) | O21              | Dy2  | O14 <sup>4</sup> | 78.3(6)   |
| O15 <sup>1</sup> | Dy1  | O23              | 121.3(2)  | O21              | Dy2  | O18 <sup>4</sup> | 87.4(7)   |
| O17 <sup>1</sup> | Dy1  | O3               | 128.7(2)  | O21              | Dy2  | O19              | 134.4(7)  |
| O22              | Dy1  | O3               | 149.6(2)  | O21              | Dy2  | O20A             | 150.5(8)  |

|     |     |                  |          |                  |      |                  |           |
|-----|-----|------------------|----------|------------------|------|------------------|-----------|
| O22 | Dy1 | O4               | 155.6(3) | O20A             | Dy2  | O14 <sup>4</sup> | 72.3(6)   |
| O22 | Dy1 | O15 <sup>1</sup> | 105.7(3) | O20A             | Dy2  | O18 <sup>4</sup> | 75.9(7)   |
| O22 | Dy1 | O17 <sup>1</sup> | 78.9(3)  | O20A             | Dy2  | O19              | 69.9(7)   |
| O22 | Dy1 | O23              | 82.3(3)  | O14 <sup>4</sup> | Dy2A | O19              | 116.1(7)  |
| O23 | Dy1 | O3               | 115.7(3) | O16 <sup>5</sup> | Dy2A | O14 <sup>4</sup> | 153.3(7)  |
| O23 | Dy1 | O17 <sup>1</sup> | 72.1(2)  | O16 <sup>5</sup> | Dy2A | O18 <sup>4</sup> | 152.8(5)  |
| O1  | Dy2 | O2               | 155.2(3) | O16 <sup>5</sup> | Dy2A | O19              | 65.1(6)   |
| O1  | Dy2 | O14 <sup>4</sup> | 126.7(2) | O16 <sup>5</sup> | Dy2A | O1A              | 80.4(13)  |
| O1  | Dy2 | O16 <sup>5</sup> | 83.0(3)  | O16 <sup>5</sup> | Dy2A | O11A             | 81.2(16)  |
| O1  | Dy2 | O18 <sup>4</sup> | 75.4(3)  | O18 <sup>4</sup> | Dy2A | O14 <sup>4</sup> | 52.2(3)   |
| O1  | Dy2 | O19              | 77.5(3)  | O18 <sup>4</sup> | Dy2A | O19              | 120.3(9)  |
| O1  | Dy2 | O20              | 74.6(6)  | O1A              | Dy2A | O19              | 82.6(12)  |
| O1  | Dy2 | O21              | 111.4(6) | O11A             | Dy2A | O19              | 75.5(13)  |
| O1  | Dy2 | O20A             | 87.9(6)  | O11A             | Dy2A | O1A              | 155.8(19) |
| O2  | Dy2 | O14 <sup>4</sup> | 73.7(2)  | O21A             | Dy2A | O19              | 150.9(8)  |
| O2  | Dy2 | O16 <sup>5</sup> | 86.5(3)  | O21A             | Dy2A | O1A              | 86.3(12)  |
| O2  | Dy2 | O18 <sup>4</sup> | 125.8(3) | O21A             | Dy2A | O11A             | 108.1(16) |

**Table S9.** Selected bond lengths (Å) for **2-Sm**.

| Atom | Atom             | Length/Å  | Atom | Atom             | Length/Å  |
|------|------------------|-----------|------|------------------|-----------|
| Sm1  | O3               | 2.492(6)  | Sm2  | O2               | 2.372(6)  |
| Sm1  | O4               | 2.485(7)  | Sm2  | O11              | 2.938(12) |
| Sm1  | O12 <sup>1</sup> | 2.338(5)  | Sm2  | O14 <sup>4</sup> | 2.459(5)  |
| Sm1  | O13 <sup>2</sup> | 2.305(5)  | Sm2  | O16 <sup>5</sup> | 2.366(6)  |
| Sm1  | O15 <sup>3</sup> | 2.443(5)  | Sm2  | O18 <sup>4</sup> | 2.540(6)  |
| Sm1  | O17 <sup>3</sup> | 2.457(5)  | Sm2  | O19              | 2.519(7)  |
| Sm1  | O22              | 2.351(8)  | Sm2  | O20              | 2.419(8)  |
| Sm1  | O23              | 2.446(7)  | Sm2  | O21              | 2.475(11) |
| Sm2  | O1               | 2.333(11) | Sm2  | O1A              | 2.374(14) |

**Table S10.** Selected bond angles (°) for **2-Sm**.

| Atom             | Atom | Atom             | Angle/°   | Atom | Atom | Atom             | Angle/°  |
|------------------|------|------------------|-----------|------|------|------------------|----------|
| O4               | Sm1  | O3               | 51.80(18) | O1   | Sm2  | O21              | 83.0(4)  |
| O12 <sup>1</sup> | Sm1  | O3               | 76.34(19) | O2   | Sm2  | O11              | 45.8(3)  |
| O12 <sup>1</sup> | Sm1  | O4               | 124.7(2)  | O2   | Sm2  | O14 <sup>4</sup> | 74.7(2)  |
| O12 <sup>1</sup> | Sm1  | O15 <sup>2</sup> | 78.53(19) | O2   | Sm2  | O18 <sup>4</sup> | 124.9(2) |
| O12 <sup>1</sup> | Sm1  | O17 <sup>2</sup> | 118.7(2)  | O2   | Sm2  | O19              | 72.0(2)  |
| O12 <sup>1</sup> | Sm1  | O22              | 79.2(2)   | O2   | Sm2  | O20              | 85.4(3)  |
| O12 <sup>1</sup> | Sm1  | O23              | 156.2(2)  | O2   | Sm2  | O21              | 116.0(4) |

|                  |     |                  |            |                  |     |                  |           |
|------------------|-----|------------------|------------|------------------|-----|------------------|-----------|
| O13 <sup>3</sup> | Sm1 | O3               | 77.7(2)    | O2               | Sm2 | O1A              | 141.6(4)  |
| O13 <sup>3</sup> | Sm1 | O4               | 98.3(2)    | O14 <sup>4</sup> | Sm2 | O11              | 67.8(2)   |
| O13 <sup>3</sup> | Sm1 | O12 <sup>1</sup> | 86.66(19)  | O14 <sup>4</sup> | Sm2 | O18 <sup>4</sup> | 51.69(17) |
| O13 <sup>3</sup> | Sm1 | O15 <sup>2</sup> | 160.36(19) | O14 <sup>4</sup> | Sm2 | O19              | 131.0(2)  |
| O13 <sup>3</sup> | Sm1 | O17 <sup>2</sup> | 146.80(19) | O14 <sup>4</sup> | Sm2 | O21              | 82.9(3)   |
| O13 <sup>3</sup> | Sm1 | O22              | 84.2(3)    | O16 <sup>5</sup> | Sm2 | O2               | 92.2(2)   |
| O13 <sup>3</sup> | Sm1 | O23              | 76.6(2)    | O16 <sup>5</sup> | Sm2 | O11              | 79.1(2)   |
| O15 <sup>2</sup> | Sm1 | O3               | 86.3(2)    | O16 <sup>5</sup> | Sm2 | O14 <sup>4</sup> | 144.1(3)  |
| O15 <sup>2</sup> | Sm1 | O4               | 80.1(3)    | O16 <sup>5</sup> | Sm2 | O18 <sup>4</sup> | 138.0(2)  |
| O15 <sup>2</sup> | Sm1 | O17 <sup>2</sup> | 52.82(18)  | O16 <sup>5</sup> | Sm2 | O19              | 72.0(3)   |
| O15 <sup>2</sup> | Sm1 | O23              | 121.1(2)   | O16 <sup>5</sup> | Sm2 | O20              | 139.8(3)  |
| O17 <sup>2</sup> | Sm1 | O3               | 126.6(2)   | O16 <sup>5</sup> | Sm2 | O21              | 73.0(4)   |
| O17 <sup>2</sup> | Sm1 | O4               | 84.9(2)    | O16 <sup>5</sup> | Sm2 | O1A              | 86.3(4)   |
| O22              | Sm1 | O3               | 150.2(2)   | O18 <sup>4</sup> | Sm2 | O11              | 111.4(2)  |
| O22              | Sm1 | O4               | 156.0(2)   | O19              | Sm2 | O11              | 109.1(2)  |
| O22              | Sm1 | O15 <sup>2</sup> | 105.3(3)   | O19              | Sm2 | O18 <sup>4</sup> | 133.2(2)  |
| O22              | Sm1 | O17 <sup>2</sup> | 80.4(3)    | O20              | Sm2 | O11              | 123.3(3)  |
| O22              | Sm1 | O23              | 82.4(3)    | O20              | Sm2 | O14 <sup>4</sup> | 73.4(3)   |
| O23              | Sm1 | O3               | 115.4(3)   | O20              | Sm2 | O18 <sup>4</sup> | 69.6(3)   |
| O23              | Sm1 | O4               | 75.1(3)    | O20              | Sm2 | O19              | 69.1(3)   |
| O23              | Sm1 | O17 <sup>2</sup> | 72.3(2)    | O20              | Sm2 | O21              | 142.7(4)  |
| O1               | Sm2 | O2               | 155.9(4)   | O21              | Sm2 | O11              | 70.2(3)   |
| O1               | Sm2 | O11              | 149.2(4)   | O21              | Sm2 | O18 <sup>4</sup> | 73.1(3)   |
| O1               | Sm2 | O14 <sup>4</sup> | 124.8(3)   | O21              | Sm2 | O19              | 144.4(3)  |
| O1               | Sm2 | O16 <sup>5</sup> | 78.8(4)    | O1A              | Sm2 | O11              | 164.3(4)  |
| O1               | Sm2 | O18 <sup>4</sup> | 73.1(3)    | O1A              | Sm2 | O19              | 71.0(4)   |
| O1               | Sm2 | O19              | 83.9(4)    | O1A              | Sm2 | O20              | 72.0(4)   |
| O1               | Sm2 | O20              | 87.3(4)    | O1A              | Sm2 | O21              | 100.2(5)  |

**Table S11.** ICP analysis results of **1-Eu** and **2-Eu**.

| Name        | Weight/mg | Volume/mL | Ion              | Concentration/mg L <sup>-1</sup> | Weight Percentage/wt.% |
|-------------|-----------|-----------|------------------|----------------------------------|------------------------|
| <b>1-Eu</b> | 17.6      | 100       | Fe <sup>3+</sup> | 0.041                            | 0.023                  |
| <b>1-Eu</b> | 16.3      | 100       | Zn <sup>2+</sup> | -0.021                           | -                      |
| <b>2-Eu</b> | 17.2      | 100       | Mg <sup>2+</sup> | 0.186                            | 0.108                  |
| <b>2-Eu</b> | 15.9      | 100       | Zn <sup>2+</sup> | -0.030                           | -                      |
